# Supplementary material for: Detection of Old and New World Relapsing Fever Borreliae in Ornithodoros Ticks Collected from Warthog Burrows in Zambia
Source: MDPI journal article supplement (doi:10.3390/microorganisms11010200), 2023-01-12
Supplement: s1 [file Table S1_rev1.xlsx]

## Sheet: Sheet1
	Table S1. The primers used for PCRs in the present study
	Target gene encoding	Primer name	Sequence (5’-3’)	Note
	Flagellin	BflaPAD	GATCARGCWCAAYATAACCAWATGCA	First-PCR
		BflaPDU	AGATTCAAGTCTGTTTTGGAAAGC
		BflaPCR	TGATCAGTTATCATTCTAATAGCA	Nested-PCR
		BflaPBU	GCTGAAGAGCTTGGAATGCAACC
	16S ribosomal DNA	BF1	GCTGGCAGTGCGTCTTAAGC
		BR1	GCTTCGGGTATCCTCAACTC
	glycerophosphodiester-phosphodiesterase	glpQf1F	CATTAATTATAGCTCACAGAG	Fragment 1
		glpQf1R	AACAAGCATTATCAATTTTCC
		glpQf2F	TATGGCATAAACAACAAGGTA	Fragment 2
		glpQf2R	AATCTGTAAATAGACCATCTA
	hypoxanthine-guanine phosphoribosyltransferase	hptdegF	GCAGAYATTACAAGAGARATGG
		hptdegR	CYTCRTCACCCCATTGAGTTCC
