# Supplementary material for: Detection of Old and New World Relapsing Fever Borreliae in Ornithodoros Ticks Collected from Warthog Burrows in Zambia
Source: MDPI journal article supplement (doi:10.3390/microorganisms11010200), 2023-01-12
Supplement: s1 [file Table S2_rev1.xlsx]

## Sheet: Sheet1
		Table S2. List of positive samples with accession number and the real-time PCR results.
		Sample ID	Tick species	flaB	16S rDNA	glpQ	hpt	Real-time PCR (copies/uL)
								NWB_VIC_1794	OWB_FAM_1795
		MTNP-6	Ornithodoros moubata	flaB_Type 1 (LC741328)	-	NT	NT	1238.07	ND
		MTNP-7	Ornithodoros moubata	flaB_Type 2 (LC741329)	16S_Type 1 (LC741320)	-	-	1255.13	ND
		MTNP-8	Ornithodoros moubata	flaB_Type 1	16S_Type 1	-	-	NT	NT
		MTNP-9	Ornithodoros moubata	flaB_Type 1	16S_Type 1	-	-	46.0024	ND
		MTNP-10	Ornithodoros moubata	flaB_Type 1	16S_Type 2 (LC741321)	-	-	178.535	ND
		MTNP-13	Ornithodoros moubata	flaB_Type 3 (LC741330)	16S_Type 1	-	-	389.817	ND
		MTNP-14	Ornithodoros moubata	flaB_Type 1	16S_Type 1	-	-	20.2053	ND
		MTNP-20	Ornithodoros moubata	flaB_Type 1	-	NT	NT	25.9929	ND
		MTNP-22	Ornithodoros moubata	flaB_Type 1	16S_Type 1	-	-	63.8642	ND
		MTNP-24	Ornithodoros moubata	flaB_Type 1	16S_Type 1	-	-	44.7581	ND
		MTNP-28	Ornithodoros moubata	flaB_Type 1	16S_Type 3 (LC741322)	-	-	762.109	ND
		MTNP-29	Ornithodoros moubata	flaB_Type 1	16S_Type 1	-	-	172.012	ND
		MTNP-30	Ornithodoros moubata	flaB_Type 1	16S_Type 4 (LC741323)	-	-	594.918	ND
		MTNP-31	Ornithodoros moubata	flaB_Type 1	16S_Type 1	-	-	134.694	ND
		MTNP-32	Ornithodoros moubata	flaB_Type 4 (LC741331)	16S_Type 5 (LC741324)	LC741336	LC741337	ND	287.622
		MTNP-33	Ornithodoros moubata	flaB_Type 1	16S_Type 1	-	-	119.512	ND
		MTNP-34	Ornithodoros moubata	flaB_Type 1	16S_Type 6 (LC741325)	-	-	476.494	ND
		MTNP-36	Ornithodoros moubata	flaB_Type 1	16S_Type 4	-	-	486.95	ND
		MTNP-37	Ornithodoros moubata	flaB_Type 1	16S_Type 3	-	-	18.1391	ND
		MTNP-40	Ornithodoros moubata	flaB_Type 1	-	NT	NT	18.2895	ND
		MTNP-41	Ornithodoros moubata	flaB_Type 1	16S_Type 1	-	-	130.138	ND
		MTNP-42	Ornithodoros moubata	flaB_Type 1	16S_Type 1	-	-	242.068	ND
		MTNP-43	Ornithodoros moubata	flaB_Type 1	16S_Type 1	-	-	16.9861	ND
		MTNP-44	Ornithodoros moubata	flaB_Type 1	-	NT	NT	34.6242	ND
		MTNP-45	Ornithodoros moubata	flaB_Type 5 (LC741332)	16S_Type 1	-	-	84.9635	ND
		MTNP-49	Ornithodoros moubata	flaB_Type 1	-	NT	NT	26.8444	ND
		MTNP-80	Ornithodoros moubata	flaB_Type 1	16S_Type 1	-	-	44.7444	ND
		MTNP-87	Ornithodoros moubata	flaB_Type 1	-	NT	NT	14.9992	ND
		MTNP-88	Ornithodoros moubata	flaB_Type 1	16S_Type 1	-	-	49.6209	ND
		MTNP-89	Ornithodoros moubata	flaB_Type 3	-	NT	NT	ND	ND
		MTNP-93	Ornithodoros moubata	flaB_Type 1	-	NT	NT	57.9594	ND
		MTNP-95	Ornithodoros moubata	flaB_Type 6 (LC741333)	-	NT	NT	ND	ND
		MTNP-96	Ornithodoros moubata	flaB_Type 3	-	NT	NT	ND	ND
		MTNP-100	Ornithodoros moubata	flaB_Type 3	16S_Type 1	-	-	5835	ND
		MTNP-103	Ornithodoros moubata	flaB_Type 3	-	NT	NT	ND	ND
		MTNP-117	Ornithodoros moubata	flaB_Type 1	-	NT	NT	4.26272	ND
		MTNP-118	Ornithodoros moubata	flaB_Type 1	-	NT	NT	92.0052	ND
		MTNP-120	Ornithodoros moubata	flaB_Type 1	-	NT	NT	114.093	ND
		MTNP-122	Ornithodoros moubata	flaB_Type 1	16S_Type 1	-	-	128.936	ND
		SLNP-13	Ornithodoros porcinus	flaB_Type 1 (LC741335) identical to LC741328	16S_Type 1 (LC741327) identical to LC741320	-	-	1058.58	ND
		SLNP-19	Ornithodoros porcinus	flaB_Type 7 (LC741334)	16S_Type 7 (LC741326)	-	-	2012.23	ND
		SLNP-27	Ornithodoros porcinus	flaB_Type 1	16S_Type 1	-	-	143.937	ND
		SLNP-34	Ornithodoros porcinus	flaB_Type 1	16S_Type 1	-	-	1645.41	ND
		-: Not amplified
		NT: Not tested
		ND: Not detected
