# Supplementary material for: Detection of Old and New World Relapsing Fever Borreliae in Ornithodoros Ticks Collected from Warthog Burrows in Zambia
Source: MDPI journal article supplement (doi:10.3390/microorganisms11010200), 2023-01-12
Supplement: s1 [file Table S3_rev1.xlsx]

## Sheet: Sheet1
	Table S3. Oligonucleotides used for real-time PCR in the present study.
	Primer and probe	Length and GC%	Tm	Fluorescent dyes	Sequence (5’-3’)	Application
			(nearest-neighbor method)*1
	16SRT-F *2	23 mer, 47.8%	58.3	-*3	GCTGTAAACGATGCACACTTGGT	Conserved in Borrelia spp.
	16SRT-R *2	22 mer, 54.6%	54.6	-	GGCGGCACACTTAACACGTTAG	Conserved in Borrelia spp.
	NWB_VIC_1794	18 mer, 38.9%	46.2	VIC	GGTACTAACCTTTCGATT	New World RF borreliae and B. miyamotoi
	OWB_FAM_1795	18 mer, 38.9%	44.6	FAM	GTACTAACCTCTCGATTA	Old World RF borreliae
	*1: A probe concentration (240 nM) was used for calculation.
	*2: Originally reported by Barbour et al. (2009) [16].
	*3: None of the fluorescent dye was modified.
